# Supplementary material for: Surface-Initiated Photoinduced Iron-Catalyzed Atom Transfer Radical Polymerization with ppm Concentration of FeBr3 under Visible Light
Source: MDPI journal article supplement (doi:10.3390/ma13225139), 2020-11-14
Supplement: s1 [file s1]

Supplementary Materials

# Surface-Initiated Photoinduced Iron-Catalyzed Atom Transfer Radical Polymerization with ppm Concentration of $\text{FeBr}_3$ under Visible Light

Monika Słowikowska <sup>1</sup>, Kamila Chajec <sup>1</sup>, Adam Michalski <sup>1,2</sup>, Szczepan Zapotoczny <sup>1</sup> and Karol Wolski <sup>1,\*</sup>

<sup>1</sup> Faculty of Chemistry, Jagiellonian University, Gronostajowa 2, 30-387 Kraków, Poland; slowikowska@chemia.uj.edu.pl (M.S.); kamila.chajec@spoko.pl (K.C.); michadam@cbmm.lodz.pl (A.M.); zapotocz@chemia.uj.edu.pl (S.Z.)

<sup>2</sup> Center of Molecular and Macromolecular Studies, Polish Academy of Sciences, Sienkiewicza 112, 90-363 Lodz, Poland

\* Correspondence: wolski@chemia.uj.edu.pl

Received: 27 October 2020; Accepted: 12 November 2020; Published: 14 November 2020

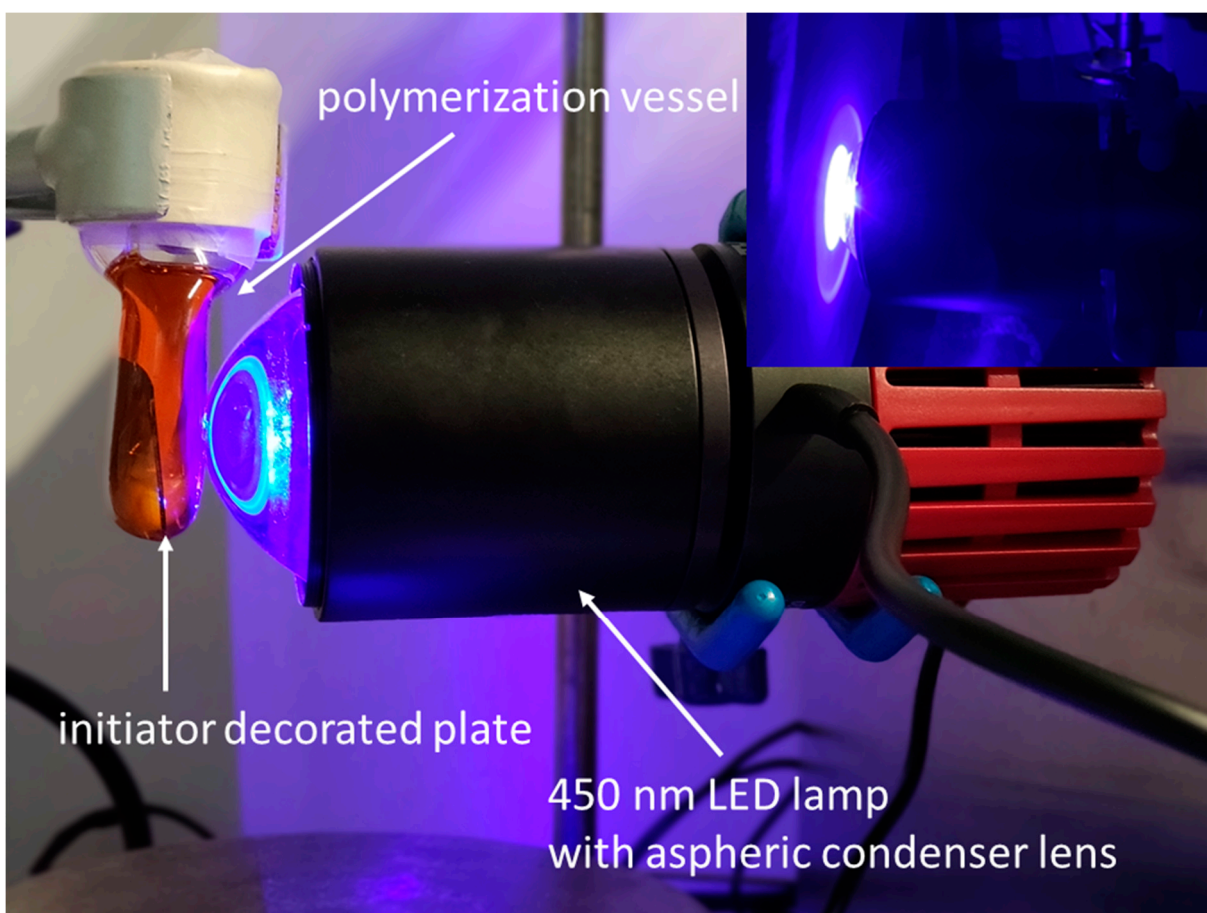

**Figure S1.** Photo of the reaction system.

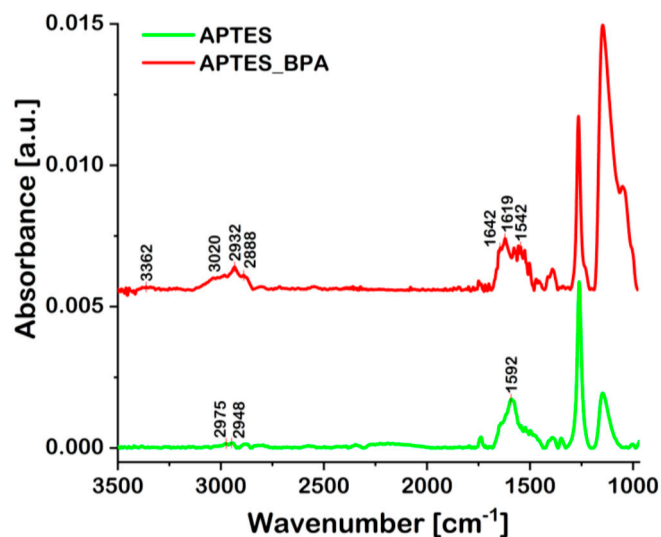

Figure S2. FTIR spectra of APTES and APTES-BPA modified ITO plate.

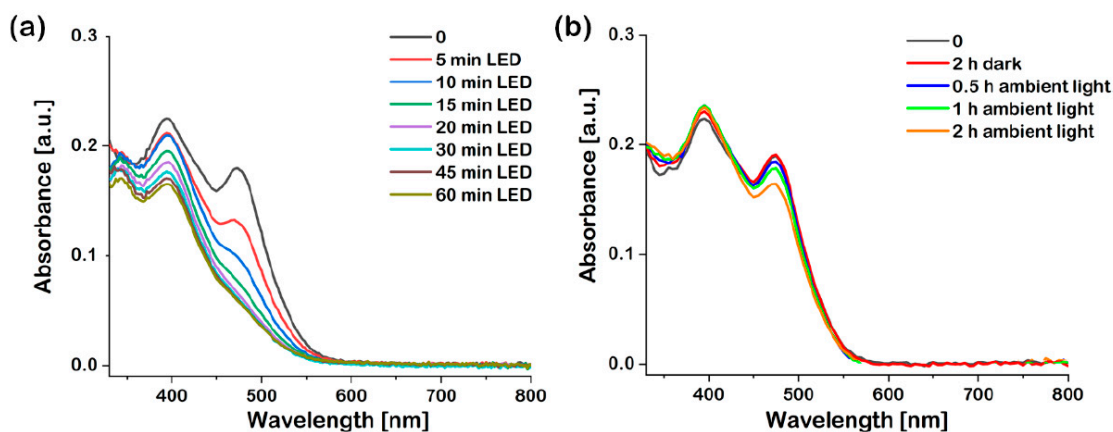

Figure S3. UV-VIS spectra of the polymerization mixture ( $[MMA]/[FeBr_3]/[TBABr] = 100/0.02/0.02$ ): (a) after various irradiation times with 450 nm LED light, and (b) exposed to ambient light and kept in darkness. The polymerization mixture was diluted 30 times before the measurements ( $[FeBr_3] = 0.03$  mM).
